# Supplementary material for: ALFY localizes to early endosomes and cellular protrusions to facilitate directional cell migration
Source: PubMed Central journal article supplement (PMC8919339; doi:10.1242/jcs.259138), 2022-02-18
Supplement: joces-135-259138-s1.pdf [file joces-135-259138-s1.pdf]

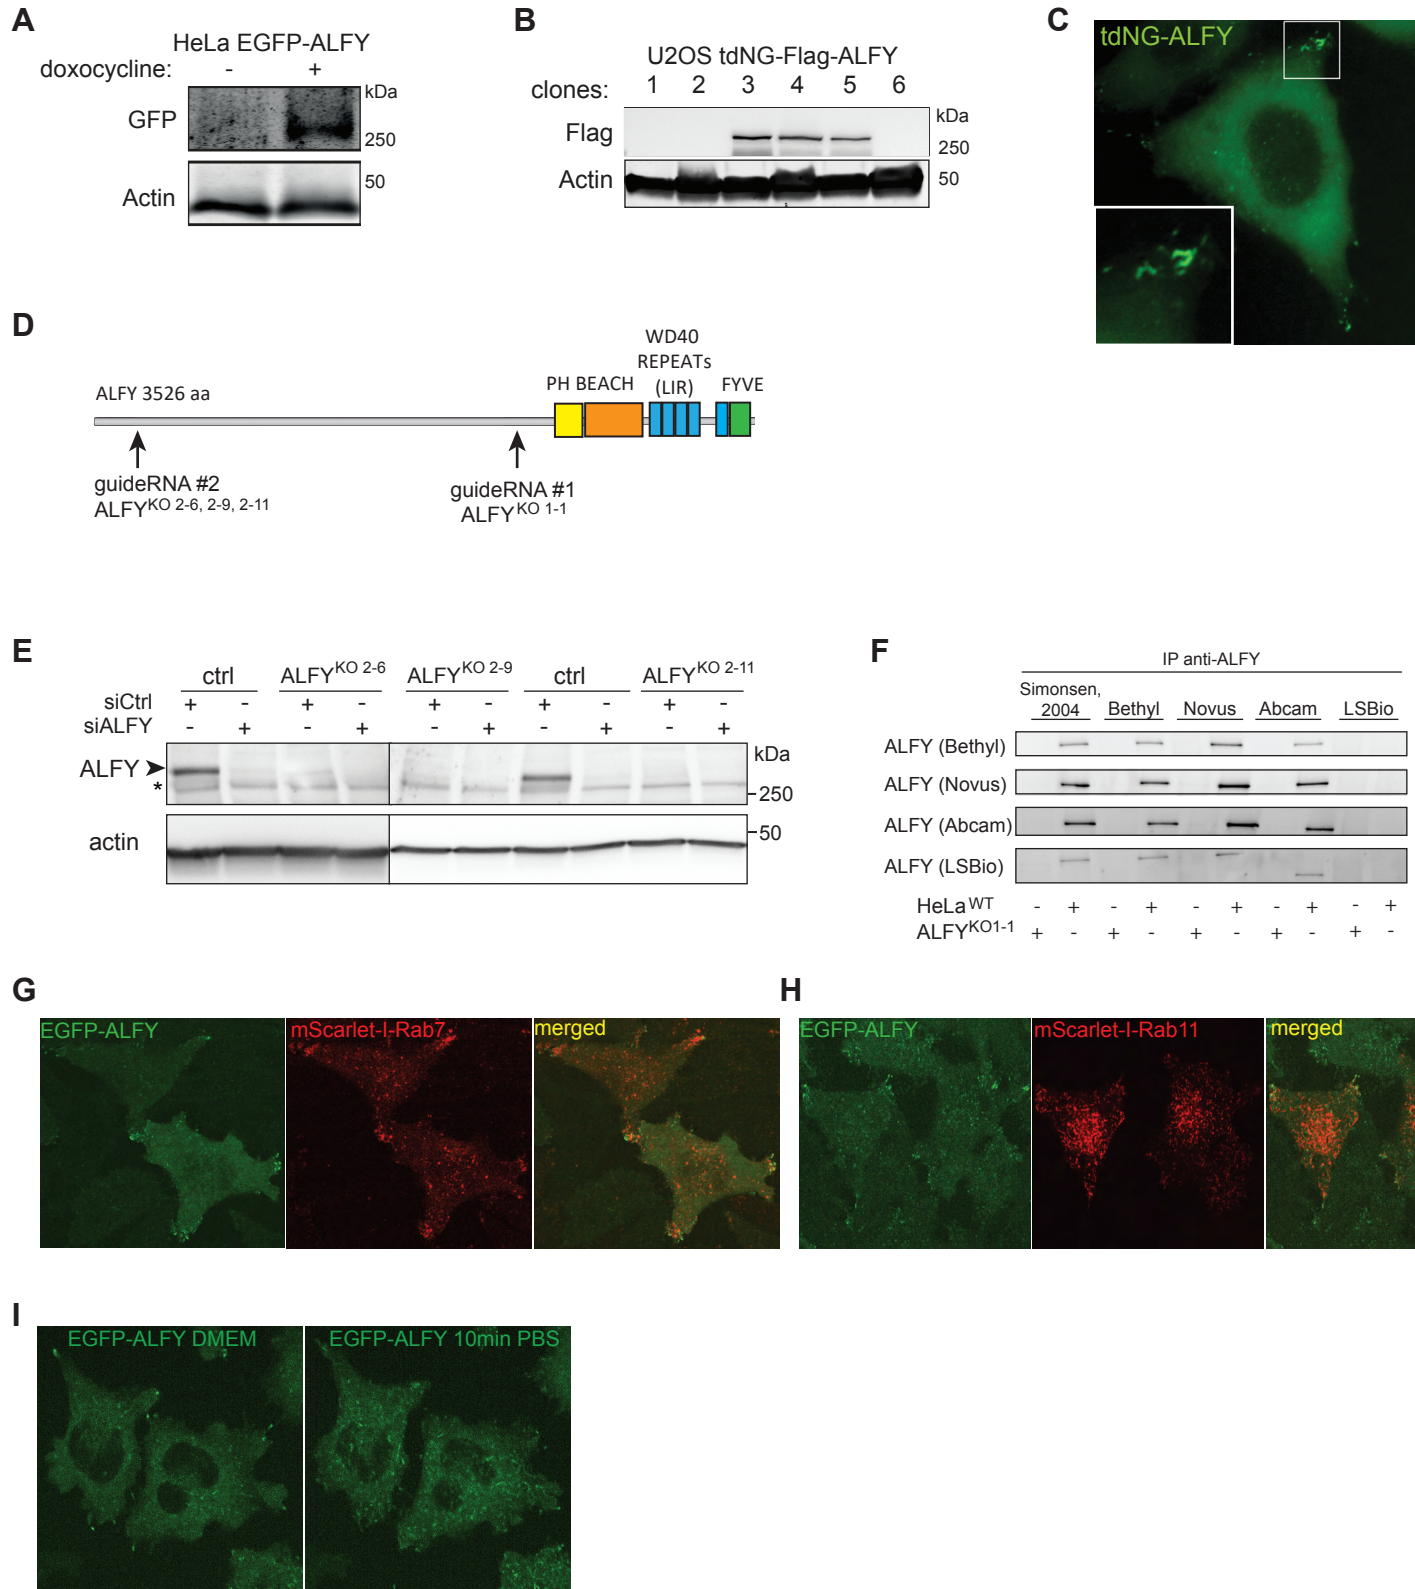

**Fig. S1. A.** HeLa cells stably transfected with EGFP-ALFY were treated with doxocycline for 24 hours to induce expression of EGFP-ALFY, followed by western blot analysis. **B.** Western blot analysis of different clones of U2OS cells stably expressing full length ALFY fused to a tag containing a tandem-dimer of NeonGreen with 3xFlag as a linker (tdNGFlag). **C.** Representative image of U2OS cells stably expressing the tdNGFlag-ALFY. **D.** Two CRISPR guides targeting ALFY were used to generate the ALFY KO cell lines. One guide targeting exon 6 (coding aa 102-138) (generating ALFY<sup>KO 2-6</sup>, ALFY<sup>KO 2-9</sup> and ALFY<sup>KO 2-11</sup>) and one guide targeting exon 47 (coding aa 2481-2535) (generating ALFY<sup>KO 1-1</sup>). **E.** Western blot analysis of endogenous ALFY protein levels to confirm KO of the ALFY<sup>KO 2-6</sup>, ALFY<sup>KO 2-9</sup> and ALFY<sup>KO 2-11</sup> cell lines. To verify the correct ALFY band the cells were treated with either control siRNA or siRNA against ALFY. **F.** Immunoprecipitation of endogenous ALFY from HeLa T-Rex FlpIn<sup>WT</sup> and ALFY<sup>KO 1-1</sup> cells was performed using different antibodies recognizing either the N- or C-terminus of ALFY, followed by western blotting with the same antibodies. **G.** and **H.** ALFY<sup>KO1-1</sup>-EGFP-ALFY cells stably expressing mScarlet-I-Rab7A (**G.**) or mScarlet-I-Rab11A (**H.**) were treated with tetracycline overnight and analysed with live cell imaging. **I.** ALFY<sup>KO1-1</sup>-EGFP-ALFY cells, treated overnight with tetracycline and imaged live in DMEM, 37°C (left) or 10 min after exchange of media for cold PBS (right).

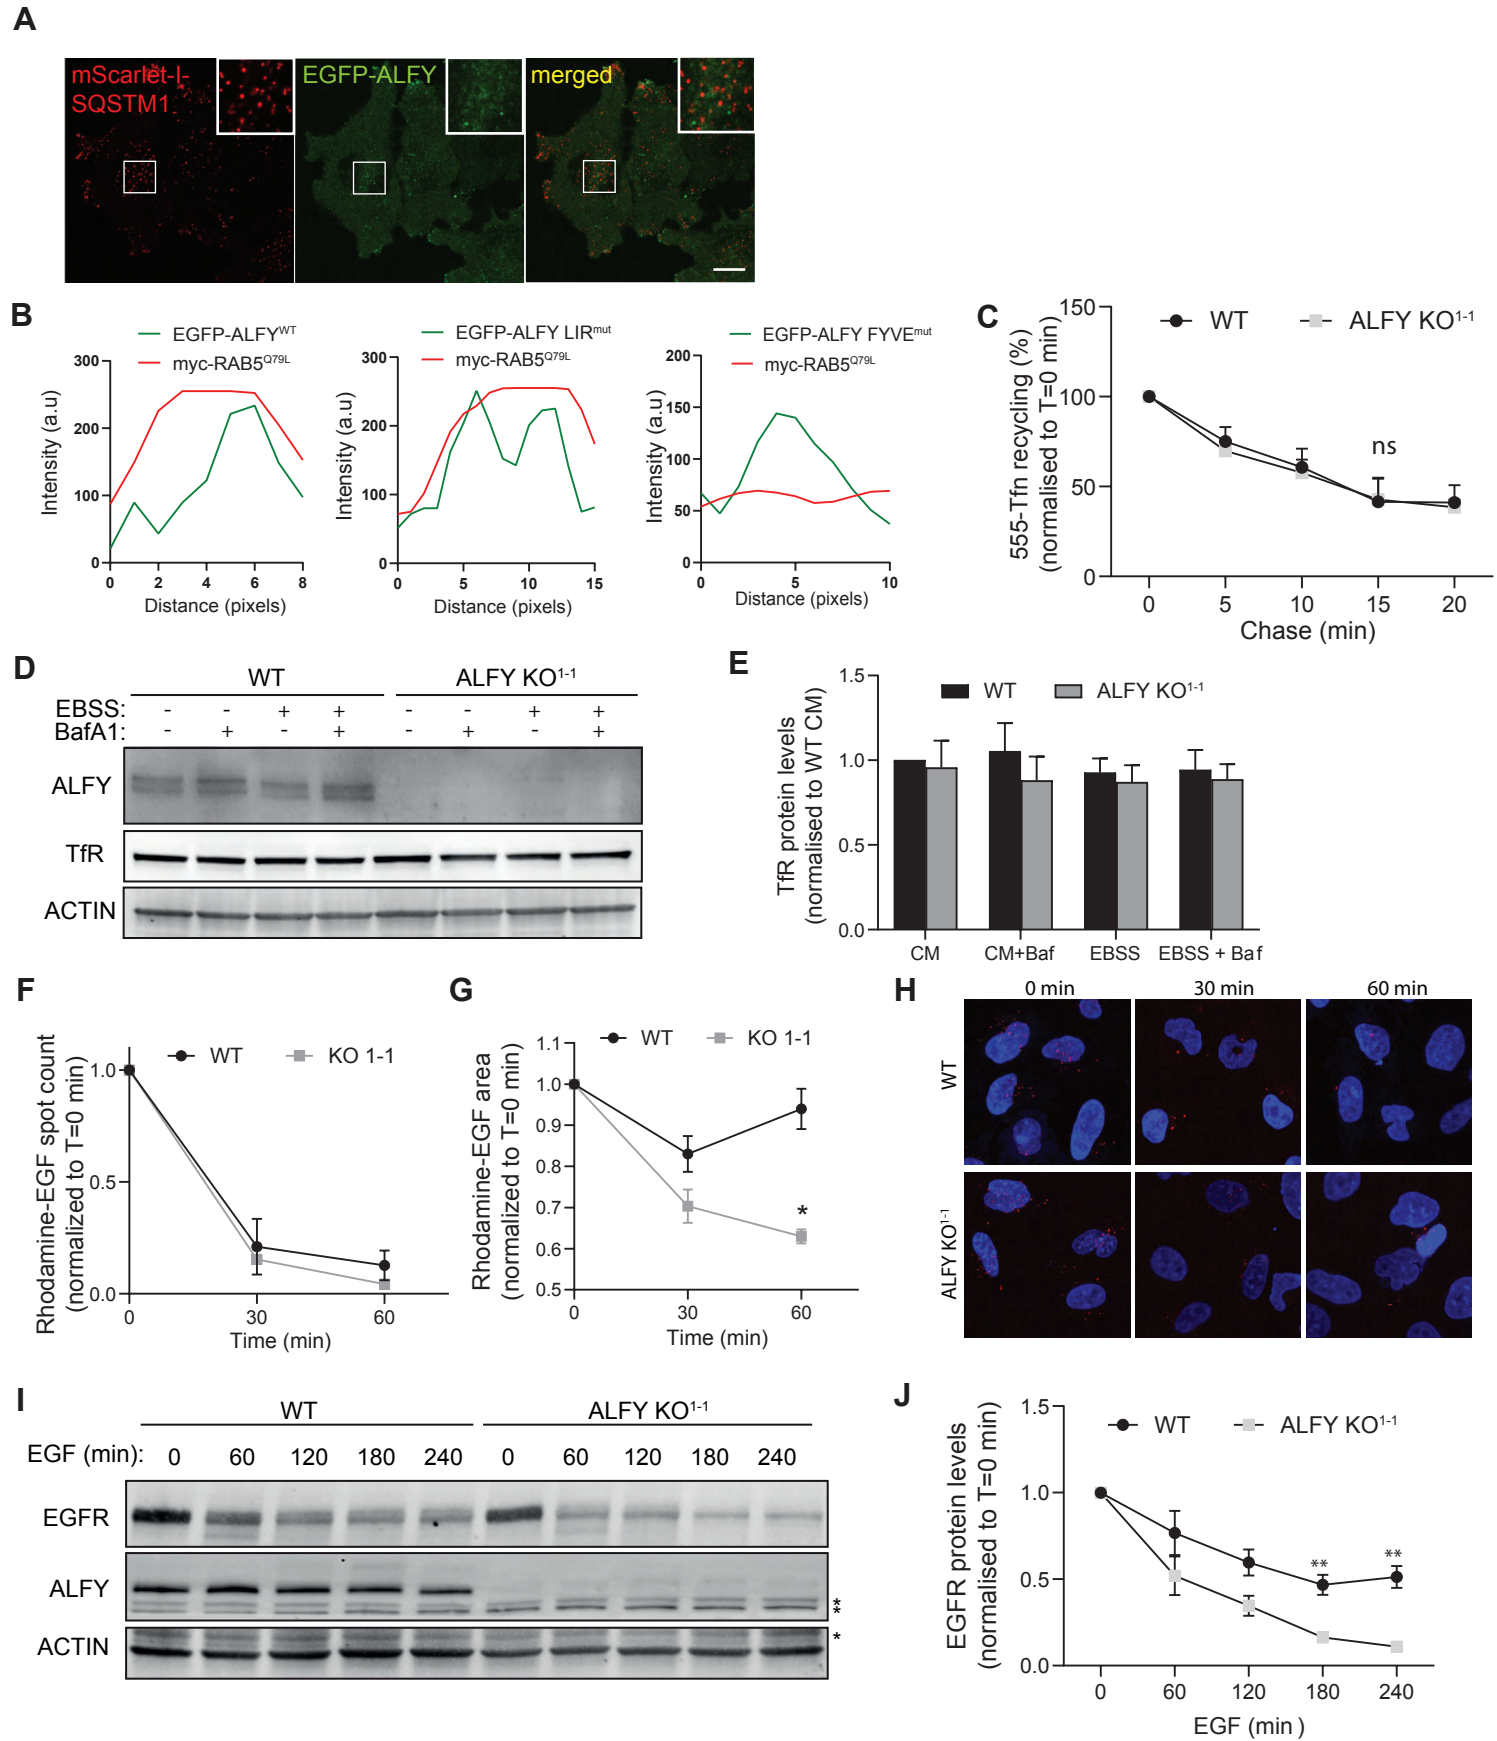

**Fig. S2. A.** ALFY<sup>KO1-1</sup>-EGFP-ALFY cells stably expressing mScarlet-I-SQSTM1 were treated with tetracycline overnight and analyzed with live cell imaging. Scale bar = 10  $\mu$ m. **B.** Colocalization histograms of EGFP-ALFY<sup>WT</sup> and myc-RAB5<sup>Q79L</sup>, generated from the EGFP-ALFY vesicles in **Fig. 2C** marked with a small arrow. **C.** 555-transferrin recycling in WT and ALFY<sup>KO1-1</sup> analyzed by flow cytometry (n=3 for T=0 and 15 min, n=2 for T=5, 10 and 20 min) **D.** Western blot analysis of transferrin receptor protein levels in WT and ALFY<sup>KO1-1</sup> cells starved or not in the presence or absence of the lysosomal inhibitor BafA1. **E.** Quantification of the TfR protein bands in **D** (n=3, p<0.05 by student's t-test). **F.** WT and ALFY<sup>KO1-1</sup> cells were treated with Rhodamine-EGF and chased for the indicated time points before fixation and imaging. Graph shows number of Rh-EGF spots (mean values of n=3 independent experiments). **G.** Quantification of Rh-EGF area (mean values of n=3 independent experiments) **H.** Representative images of the cells treated with Rhodamine-EGF (quantified in **F** and **G**). **I.** WT and ALFY<sup>KO1-1</sup> cells were treated with EGF for the indicated time points before western blot analysis of the EGFR protein levels. **J.** The EGFR protein bands from **I.** were quantified (n=3, p<0.05 by student's t-test).

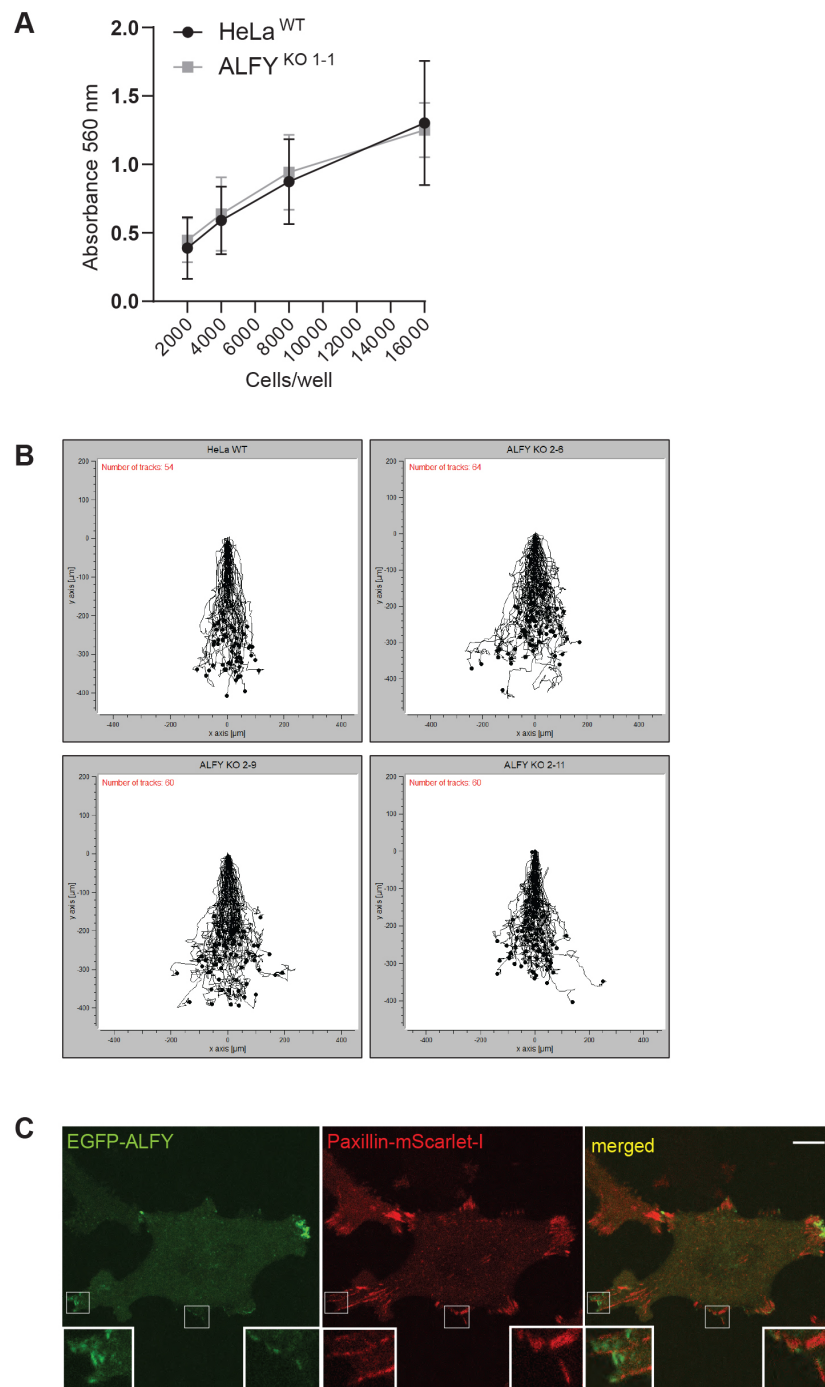

**Fig. S3.** **A.** HeLa<sup>WT</sup> and ALFY<sup>KO 1-1</sup> cells were seeded at the indicated cell densities and cell proliferation was measured after 24 hours using the MTT-assay, measuring the absorbance of solubilized formazan crystals at 560 nm. (n=4, p<0.05 by student's t-test). **B.** Graphs representing the movement of HeLa<sup>WT</sup>, ALFY<sup>KO 2-6</sup>, ALFY<sup>KO 2-9</sup> and ALFY<sup>KO 2-11</sup> cells obtained by tracking cells from three individual wound healing experiments, using the manual tracking plugin of ImageJ and the Chemotaxis and migration tool (Ibidi). **C.** ALFY<sup>KO 1-1</sup> EGFP-ALFY cells stably expressing paxillin-mScarlet-I were treated with tetracycline overnight and analyzed with live cell imaging. Scale bar = 10  $\mu$ m.



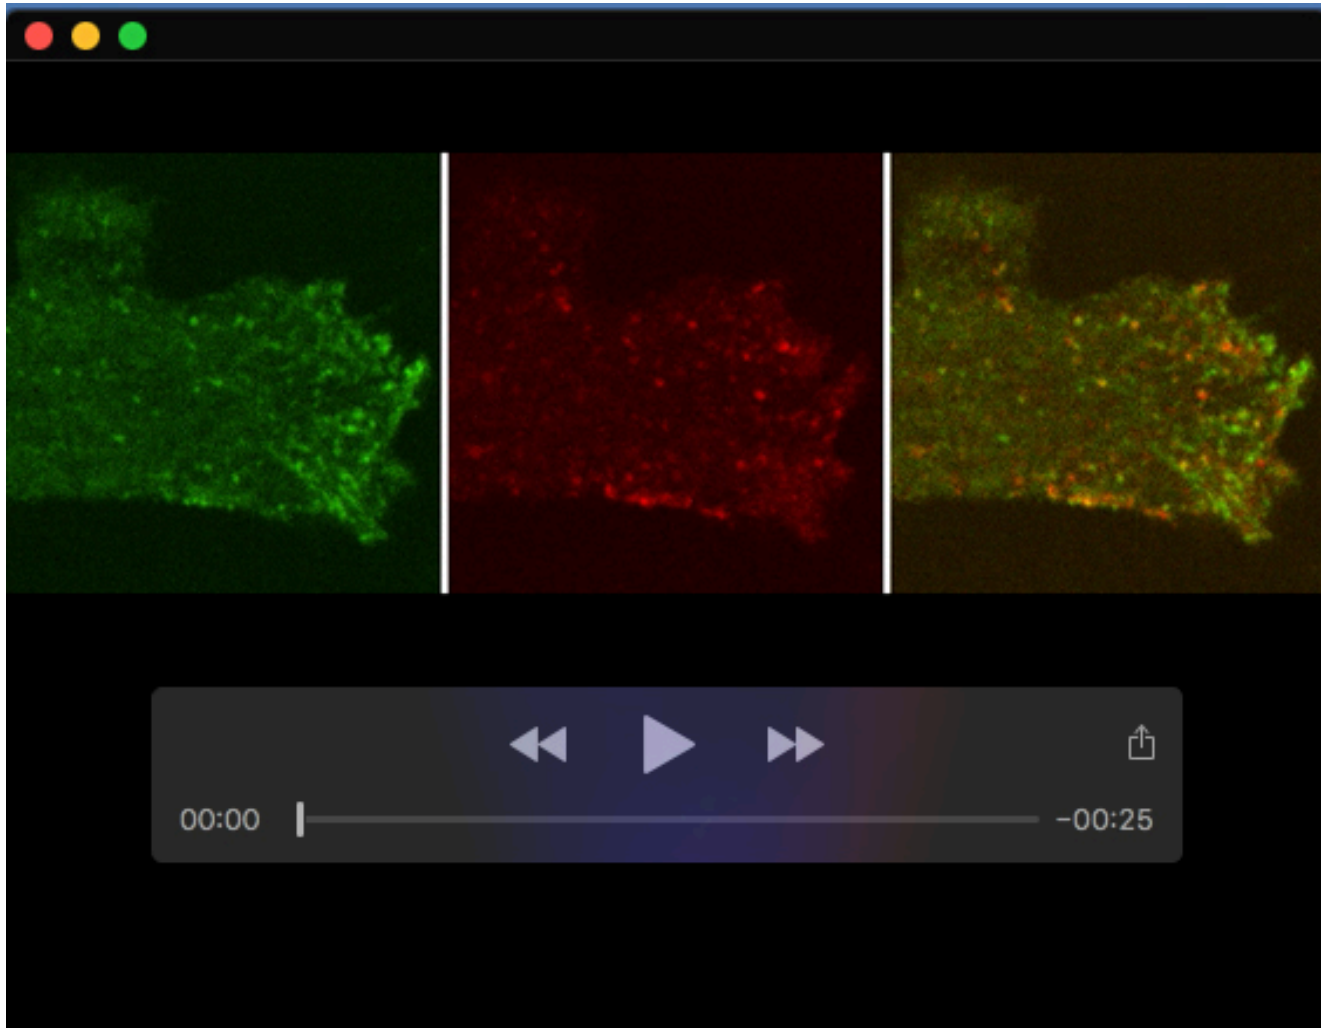

**Movie 1.** Live cell imaging of HeLa cells stably transfected with EGFP-ALFY and mScarlet-I-RAB5A

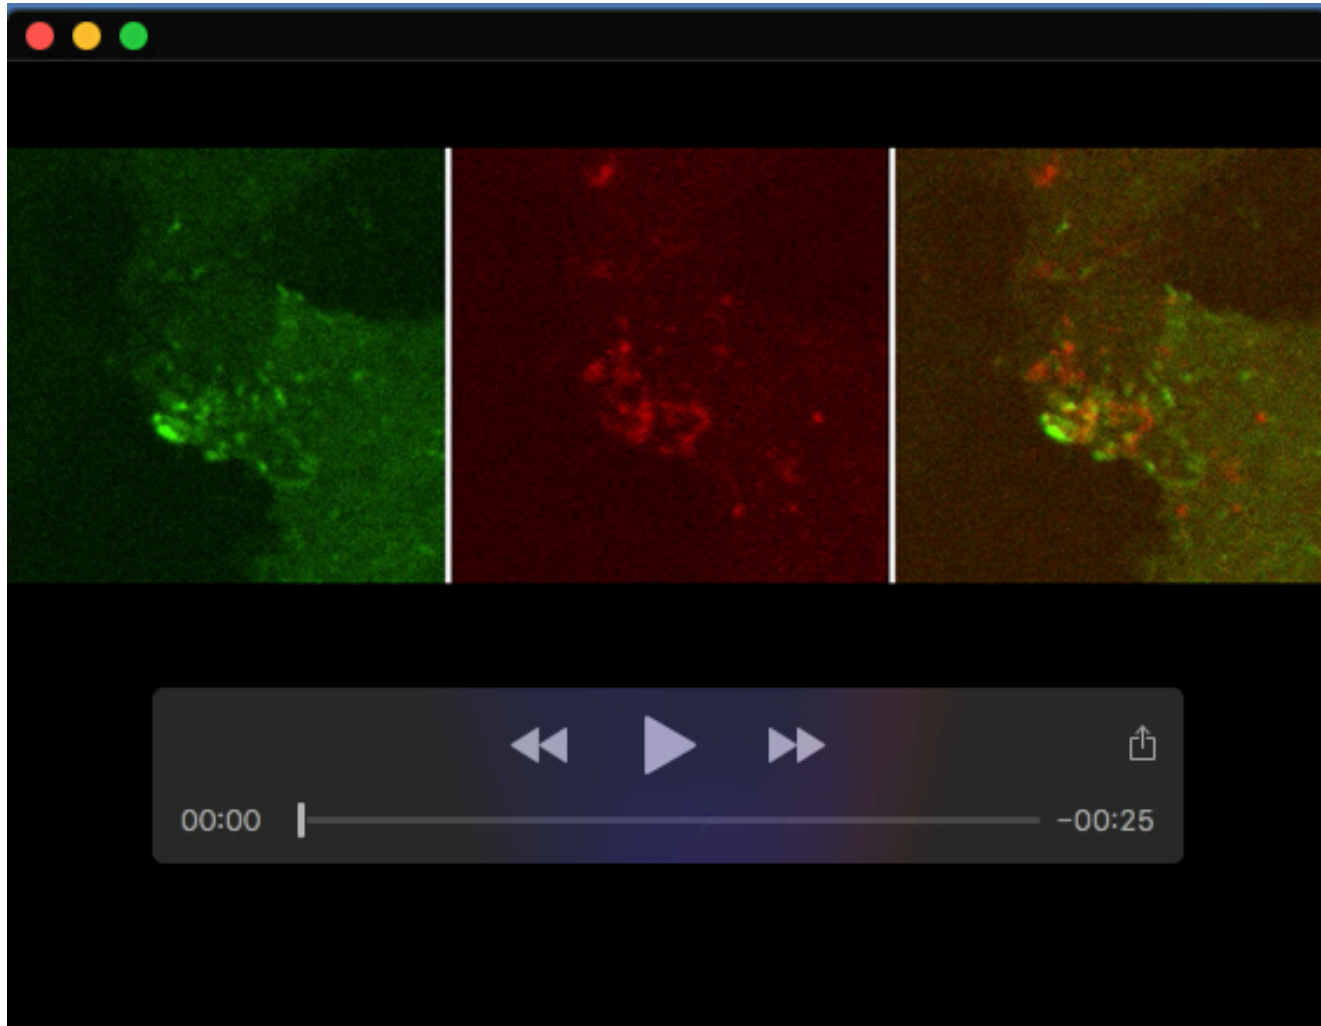

**Movie 2.** Live cell imaging of HeLa cells stably transfected with EGFP-ALFY and mScarlet-I-RAB7A

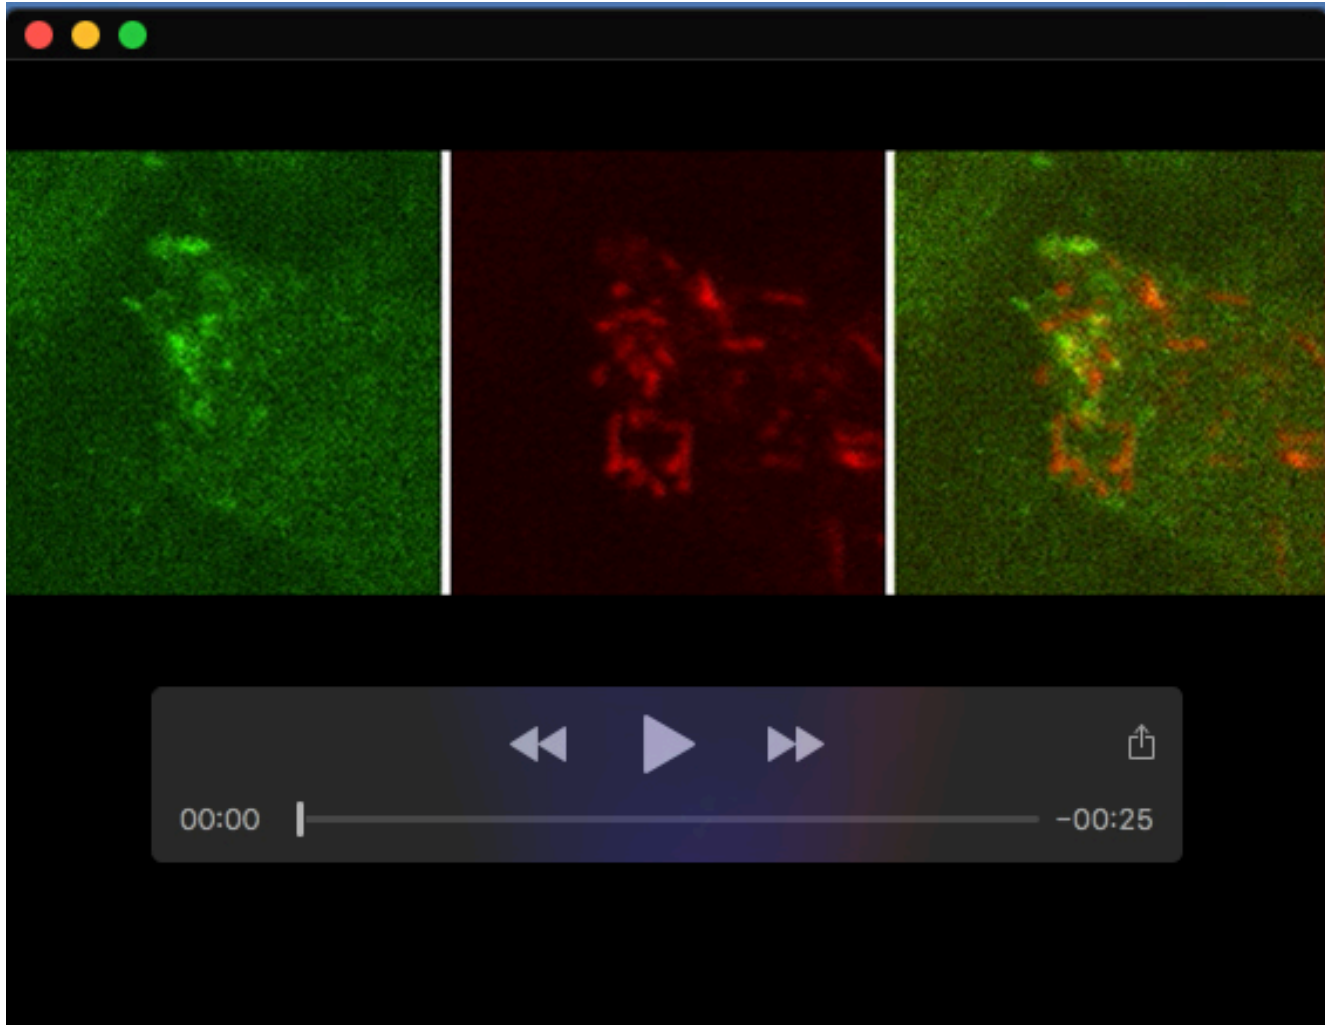

**Movie 3.** Live cell imaging of HeLa cells stably transfected with EGFP-ALFY and mScarlet-I-RAB11A
